# Supplementary material for: Characterization of currently marketed heparin products: composition analysis by 2D-NMR
Source: Royal Society of Chemistry journal article supplement (doi:10.1039/c3ay40226f), 2013-01-01
Supplement: c3ay40226f.pdf [file c3ay40226f.pdf]

Supplemental material for Analytical Methods

# Characterization of currently marketed heparin products: Composition analysis by 2D-NMR.

**David A. Keire\*<sup>a</sup>, Lucinda F. Buhse<sup>a</sup> and Ali Al-Hakim<sup>b</sup>**

<sup>a</sup>*Division of Pharmaceutical Analysis, 1114 Market St, St Louis, MO, USA. Fax: 314-539-2113;*

*Tel: 314-539-3850; E-mail: [david.keire@fda.hhs.gov](mailto:david.keire@fda.hhs.gov)*

<sup>b</sup>*Office of New Drug Quality Assessment, WO21 RM2524, 10903 New Hampshire, Silver Spring,*

*USA. Fax: 301-796-9747; Tel 301-796-1323; E-mail: [ali.alhakim@fda.hhs.gov](mailto:ali.alhakim@fda.hhs.gov)*

\*Corresponding Author: Division of Pharmaceutical Analysis, 1114 Market St, St Louis, MO,

USA. Fax: 314-539-2113; Tel: 314-539-3850; E-mail: [david.keire@fda.hhs.gov](mailto:david.keire@fda.hhs.gov)

**Supplemental Table 1:** Calculation of heparin sodium percent monosaccharide from 2D  $^1\text{H}$ - $^{13}\text{C}$  HSQC NMR integrated areas. The chemical shift value shown in parentheses are the signals integrated to obtain peak areas. For illustrative purposes, the mean values obtained from the integration of the spectra from seven lots of heparin sodium are shown.

| <b>Signals</b>                              | <b>Integrated Crosspeaks (<math>^1\text{H}/^{13}\text{C}</math> chemical shifts)</b>                                                                                                                                                                                                                                                  | <b>Mean Volume (a.u.)</b> |
|---------------------------------------------|---------------------------------------------------------------------------------------------------------------------------------------------------------------------------------------------------------------------------------------------------------------------------------------------------------------------------------------|---------------------------|
| A-Ring- $\text{C}_2$                        | $A_{\text{NS},6x}(3.27/60.7 \text{ ppm}) + A_{\text{NS},3S,6x}(3.45/59.4 \text{ ppm}) + A_{\text{NAc},6x}(3.92/56.5 \text{ ppm})$                                                                                                                                                                                                     | $253 \pm 20$              |
| A-Ring- $\text{C}_6$                        | $A_{\text{NS},6S}(4.27-4.41/69.2 \text{ ppm}) + A_{\text{NS},6\text{OH}}(3.85/62.4 \text{ ppm})$                                                                                                                                                                                                                                      | $274 \pm 22$              |
| A-Ring- $\text{C}_1$                        | $A_{\text{NS}}-(\text{G})(5.58/100.5 \text{ ppm}) + A_{\text{NS},3S}(5.52/99.0 \text{ ppm}) + [A_{\text{NS},6S}-(\text{I}_2\text{S}) + A_{\text{NAc}}-(\text{G})](5.41/99.6 \text{ ppm}) + A_{\text{NS},6x}-(\text{I})(5.34/98.4 \text{ ppm}) + A_{\text{NS}}-\alpha\text{Red}(5.44/94.0 \text{ ppm})$                                | $285 \pm 26$              |
| Mean A                                      | Mean of $\text{C}_2$ , $\text{C}_6$ and $\text{C}_1$ Areas                                                                                                                                                                                                                                                                            | $272 \pm 21$              |
| U-Ring- $\text{C}_1$                        | $\text{I}_2\text{S}-(A_{\text{NS},6x})(5.22/102.1 \text{ ppm}) + \text{I}-(A_{\text{NS},6S})(5.01/105.0 \text{ ppm}) + \text{I}-(A_{\text{NS}})(4.95/104.7 \text{ ppm}) + \text{G}-(A_{\text{NS}})(4.61/104.8 \text{ ppm}) + \text{G}-(A_{\text{NAc}})(4.52/105.3 \text{ ppm}) + \text{G}-(A_{\text{NS},3S})(4.61/103.9 \text{ ppm})$ | $285 \pm 18$              |
| <b>%Monosacch.</b>                          | <b>Calculation used</b>                                                                                                                                                                                                                                                                                                               |                           |
| $A_{\text{NS},6x} (\text{C}_6)$             | $A_{\text{NS},6S}(4.27-4.41/69.2 \text{ ppm}) \div \text{A-Ring-}\text{C}_6$                                                                                                                                                                                                                                                          |                           |
| $A_{\text{NS},6\text{OH}} (\text{C}_6)$     | $A_{\text{NS},6\text{OH}}(3.85/62.4 \text{ ppm}) \div \text{A-Ring-}\text{C}_6$                                                                                                                                                                                                                                                       |                           |
| $A_{\text{NS},3S} (\text{C}_2)$             | $A_{\text{NS},3S}(3.45/59.4 \text{ ppm}) \div \text{A-Ring-}\text{C}_2$                                                                                                                                                                                                                                                               |                           |
| $A_{\text{NAc}} (\text{C}_2)$               | $A_{\text{NAc}}(3.92/56.5 \text{ ppm}) \div \text{A-Ring-}\text{C}_2$                                                                                                                                                                                                                                                                 |                           |
| $A_{\text{NS}}-\alpha\text{Red-}\text{C}_1$ | $A_{\text{NS}}-\alpha\text{Red}(5.44/94.1 \text{ ppm}) \div \text{A ring-}\text{C}_1$                                                                                                                                                                                                                                                 |                           |
| $\text{I}_2\text{S}$                        | $\text{I}_2\text{S}-(A_{\text{NS},6x})(5.22/102.1 \text{ ppm}) \div \text{U-Ring-}\text{C}_1$                                                                                                                                                                                                                                         |                           |
| $\text{I}_{2\text{OH}}$                     | $\text{I}-(A_{\text{NS},6S})(5.01/105.0 \text{ ppm}) + \text{I}-(A_{\text{NS}})(4.95/104.7 \text{ ppm}) \div \text{U-Ring-}\text{C}_1$                                                                                                                                                                                                |                           |
| $\text{G}_{2\text{OH}}$                     | $\text{G}-(A_{\text{NS}})(4.61/104.8 \text{ ppm}) + \text{G}-(A_{\text{NAc}})(4.52/105.3 \text{ ppm}) + \text{G}-(A_{\text{NS},3S})(4.61/103.9 \text{ ppm}) \div \text{U-Ring-}\text{C}_1$                                                                                                                                            |                           |
| Linker ( $\text{C}_1$ )                     | $\text{Xylose H}_1/\text{C}_1(4.46/105.8 \text{ ppm}) \div \{[\text{U-Ring-}\text{C}_1 + \text{Mean A}] \div 2\}$                                                                                                                                                                                                                     |                           |

**Supplemental Table 2:** Calculation of heparin sodium percent disaccharide composition from only anomeric ( $H_1/C_1$ ) 2D  $^1H$ - $^{13}C$  HSQC-NMR integrated areas. The chemical shift value shown in parentheses are the signals integrated to obtain peak areas.

| <b><u>Signals</u></b>              | <b><u>Integrated Crosspeaks (<math>^1H/^{13}C</math> chemical shifts)</u></b>                                                                                                                                                                                    | <b><u>Mean Volume (a.u.)</u></b> |
|------------------------------------|------------------------------------------------------------------------------------------------------------------------------------------------------------------------------------------------------------------------------------------------------------------|----------------------------------|
| A-Ring- $C_1$                      | $A_{NS-(G)}(5.58/100.5 \text{ ppm}) + A_{NS,3S}(5.52/99.0 \text{ ppm}) + [A_{NS,6S-(I_{2S})} + A_{NAc-(G)}](5.41/99.6 \text{ ppm}) + A_{NS,6x-(I)}(5.34/98.4 \text{ ppm}) + A_{NS-\alpha Red}(5.44/94.0 \text{ ppm}) + A_{NS-\alpha Red}(5.44/94.1 \text{ ppm})$ | $285 \pm 26$                     |
| U-Ring- $C_1$                      | $I_{2S-(A_{NS,6x})}(5.22/102.1 \text{ ppm}) + I-(A_{NS,6S})(5.01/105.0 \text{ ppm}) + I-(A_{NS})(4.95/104.7 \text{ ppm}) + G-(A_{NS})(4.61/104.8 \text{ ppm}) + G-(A_{NAc})(4.52/105.3 \text{ ppm}) + G-(A_{NS,3S,6x})(4.61/103.9 \text{ ppm})$                  | $285 \pm 18$                     |
| <b><u>%Disaccharide</u></b>        | <b><u>Calculation used</u></b>                                                                                                                                                                                                                                   |                                  |
| $A_{NS,6x-(I_{2S})} + A_{NAc-(G)}$ | $[A_{NS,6x-(I_{2S})} + A_{NAc-(G)}](5.41/99.6 \text{ ppm}) \div \text{A-Ring-}C_1$                                                                                                                                                                               |                                  |
| $A_{NS,6x-(I_{2OH})}$              | $A_{NS,6x-(I_{2OH})}(5.34/98.4 \text{ ppm}) \div \text{A-Ring-}C_1$                                                                                                                                                                                              |                                  |
| $A_{NS,6x-(G)}$                    | $A_{NS,6x-(G)}(5.58/100.5 \text{ ppm}) \div \text{A-Ring-}C_1$                                                                                                                                                                                                   |                                  |
| $A_{NS,3S-(X)}$                    | $A_{NS,3S}(5.52/99.0 \text{ ppm}) \div \text{A-Ring-}C_1$                                                                                                                                                                                                        |                                  |
| $I_{2S-(A_{NS,6x})}$               | $I_{2S-(A_{NS,6x})}(5.22/102.1 \text{ ppm}) \div \text{U-Ring-}C_1$                                                                                                                                                                                              |                                  |
| $I_{2OH-(A_{NS})}$                 | $I_{2OH-(A_{NS,6S})}(5.01/105.0 \text{ ppm}) \div \text{U-Ring-}C_1$                                                                                                                                                                                             |                                  |
| $G_{2OH-(A_{NS})}$                 | $G_{2OH-(A_{NS})}(4.61/104.8 \text{ ppm}) \div \text{U-Ring-}C_1$                                                                                                                                                                                                |                                  |
| $G_{2OH-(A_{NS,3S})}$              | $G_{2OH-(A_{NS,3S})}(4.61/103.9 \text{ ppm}) \div \text{U-Ring-}C_1$                                                                                                                                                                                             |                                  |
| $G_{2OH-(A_{NAc})}$                | $G_{2OH-(A_{NAc})}(4.52/105.3 \text{ ppm}) \div \text{U-Ring-}C_1$                                                                                                                                                                                               |                                  |

**Supplemental Table 3:** Calculation of percent monosaccharide in dalteparin from 2D  $^1\text{H}$ - $^{13}\text{C}$  HSQC NMR integrated cross-peak volumes. The chemical shift values in parentheses are the signals integrated. For illustrative purposes, the mean values obtained from the integration of the spectra from three lots of dalteparin are shown.

| <u>Signals</u>                                 | <u>Integrated Crosspeaks (<math>^1\text{H}/^{13}\text{C}</math> chemical shifts)</u>                                                                                                                                                                                                                                                                                                                                                                           | <u>Mean Volume (a.u.)</u> |
|------------------------------------------------|----------------------------------------------------------------------------------------------------------------------------------------------------------------------------------------------------------------------------------------------------------------------------------------------------------------------------------------------------------------------------------------------------------------------------------------------------------------|---------------------------|
| A ring- $\text{C}_2$                           | $A_{\text{NS},6\text{x}}(3.28/60.7 \text{ ppm})+A_{\text{NS},3\text{S},6\text{x}}(3.46/59.4 \text{ ppm})+A_{\text{NAC},6\text{x}}(3.94/56.6 \text{ ppm})+A_{\text{M.ol}_{6\text{x}}}(3.99/85.8 \text{ ppm})+\text{Epo-I}(3.74/54.2 \text{ ppm})$                                                                                                                                                                                                               | $41 \pm 2$                |
| A ring- $\text{C}_6$                           | $A_{\text{NS},6\text{S}}(4.27-4.39/69.2 \text{ ppm})+A_{\text{NS}}(3.87/62.5 \text{ ppm})$                                                                                                                                                                                                                                                                                                                                                                     | $50 \pm 4$                |
| A ring- $\text{C}_1$                           | $A_{\text{NS}}-(\text{G})(5.58/100.3 \text{ ppm})+A_{\text{NS},3\text{S}}(5.48/99.0 \text{ ppm})+[A_{\text{NS},6\text{S}}-(\text{I}_{2\text{S}})+A_{\text{NAC}}-(\text{G})](5.39/99.4 \text{ ppm})+A_{\text{NS},6\text{x}}-(\text{I})(5.34/98.2 \text{ ppm})+A_{\text{M.ol}_{6\text{x}}}(3.69-3.74/63.6 \text{ ppm})$                                                                                                                                          | $58 \pm 2$                |
| Avg. A ring                                    | Average of $\text{C}_6$ , $\text{C}_2$ and $\text{C}_1$ Areas                                                                                                                                                                                                                                                                                                                                                                                                  | $50 \pm 2$                |
| U/I/G-Ring Area- $\text{C}_1$                  | $\text{I}_{2\text{S}}-(A_{\text{NS},6\text{x}})(5.24/102.0 \text{ ppm})+\text{I}_{2\text{OH}}-(A_{\text{NS},6\text{S}})(5.01/104.8 \text{ ppm})+\text{I}_{2\text{OH}}-(A_{\text{NS}})(4.91/104.5 \text{ ppm})+\text{G}_{2\text{OH}}-(A_{\text{NS},3\text{S}})(4.61/103.8 \text{ ppm})+\text{G}_{2\text{OH}}-(A_{\text{NS}})(4.60/104.6 \text{ ppm})+\text{G}_{2\text{OH}}-(A_{\text{NAC}})(4.54/105.0 \text{ ppm})$                                            | $58 \pm 2$                |
| <b>%Monosacc.</b>                              | <b>Calculation Used</b>                                                                                                                                                                                                                                                                                                                                                                                                                                        |                           |
| $A_{\text{NS},6\text{S}}-\text{C}_6$           | $A_{\text{NS},6\text{S}}(4.27-4.39/68.8 \text{ ppm})\div\text{A ring}-\text{C}_6$                                                                                                                                                                                                                                                                                                                                                                              |                           |
| $A_{\text{NS},6\text{OH}}-\text{C}_6$          | $A_{\text{NS},6\text{OH}}(3.87/62.5 \text{ ppm})\div\text{A ring}-\text{C}_6$                                                                                                                                                                                                                                                                                                                                                                                  |                           |
| $A_{\text{NS},3\text{S},6\text{x}}-\text{C}_2$ | $A_{\text{NS},3\text{S},6\text{x}}(3.46/59.4 \text{ ppm})\div\text{A ring}-\text{C}_2$                                                                                                                                                                                                                                                                                                                                                                         |                           |
| $A_{\text{NAC}}-\text{C}_2$                    | $A_{\text{NAC}}(3.94/56.6 \text{ ppm})\div\text{Avg. A}-\text{C}_2$                                                                                                                                                                                                                                                                                                                                                                                            |                           |
| $A_{\text{M.ol}_{6\text{x}}}-\text{C}_2$       | $A_{\text{M.ol}_{6\text{x}}}(3.99/85.8 \text{ ppm})\div\text{A ring}-\text{C}_2$                                                                                                                                                                                                                                                                                                                                                                               |                           |
| $A_{\text{M.ol}_{6\text{OH}}}-\text{C}_X$      | $\{[(A_{\text{M.ol}_{6\text{OH}}}-\text{C}_4)(4.24/88.3 \text{ ppm})\div(A_{\text{M.ol}_{6\text{OH}}}-\text{C}_4+A_{\text{M.ol}_{6\text{S}}}-\text{C}_4)(4.18/87.4 \text{ ppm}))]+[(A_{\text{M.ol}_{6\text{OH}}}-\text{C}_5)(4.08/84.4 \text{ ppm})\div(A_{\text{M.ol}_{6\text{OH}}}-\text{C}_5+A_{\text{M.ol}_{6\text{S}}}-\text{C}_5)(4.27/82.2 \text{ ppm}))]\}\div 2\cdot[A_{\text{M.ol}_{6\text{x}}}(3.99/85.8 \text{ ppm})\div\text{A ring}-\text{C}_2]$ |                           |
| $\text{I}_{2\text{S}}-\text{C}_1$              | $\text{I}_{2\text{S}}(5.24/102.0 \text{ ppm})\div\text{U Ring } \text{C}_1$                                                                                                                                                                                                                                                                                                                                                                                    |                           |
| $\text{I}_{2\text{OH}}-\text{C}_1$             | $[\text{I}_{2\text{OH}}-(A_{\text{NS},6\text{S}})(5.01/104.8 \text{ ppm})+\text{I}_{2\text{OH}}-(A_{\text{NS}})(4.91/104.5 \text{ ppm})]\div\text{U Ring } \text{C}_1$                                                                                                                                                                                                                                                                                         |                           |
| $\text{G}_{2\text{OH}}-\text{C}_1$             | $[\text{G}_{2\text{OH}}-(A_{\text{NS}})(4.60/104.6 \text{ ppm})+\text{G}_{2\text{OH}}-(A_{\text{NS},3\text{S}})(4.61/103.8 \text{ ppm})+\text{G}_{2\text{OH}}-(A_{\text{NAC}})(4.54/105.0 \text{ ppm})]\div\text{U Ring } \text{C}_1$                                                                                                                                                                                                                          |                           |
| Epo-I- $\text{C}_2$                            | $\text{Epo-I}(3.74/54.2 \text{ ppm})\div\text{A ring}-\text{C}_2$                                                                                                                                                                                                                                                                                                                                                                                              |                           |
| Linker-Xyl- $\text{C}_1$                       | $\text{Xyl}(4.46/105.7 \text{ ppm})\div\text{U-Ring } \text{C}_1$                                                                                                                                                                                                                                                                                                                                                                                              |                           |

**Supplemental Table 4:** Calculation of dalteparin percent disaccharide composition based on 2D  $^1\text{H}$ - $^{13}\text{C}$  HSQC-NMR  $\text{H}_1/\text{C}_1$  cross-peak integrated volumes. The chemical shift value shown in parentheses are the signals integrated to obtain volumes.

| <u>Signals</u>                                                             | <u>Integrated Crosspeaks (<math>^1\text{H}/^{13}\text{C}</math> chemical shifts)</u>                                                                                                                                                                                                                                                                                      | <u>Mean Volume (a.u.)</u> |
|----------------------------------------------------------------------------|---------------------------------------------------------------------------------------------------------------------------------------------------------------------------------------------------------------------------------------------------------------------------------------------------------------------------------------------------------------------------|---------------------------|
| A ring- $\text{C}_1$                                                       | $A_{\text{NS}}-(\text{G})(5.58/100.3 \text{ ppm})+A_{\text{NS},3\text{S},6\text{X}}(5.48/99.0 \text{ ppm})+[A_{\text{NS},6\text{S}}-(\text{I}_{2\text{S}})+A_{\text{NAC}}-(\text{G})](5.39/99.4 \text{ ppm})+A_{\text{NS},6\text{X}}-(\text{I})(5.34/98.2 \text{ ppm})+A_{\text{M.01}_{6\text{X}}}(3.69-3.74/63.6 \text{ ppm})$                                           | $58 \pm 2$                |
| U/I/G-Ring Area- $\text{C}_1$                                              | $I_{2\text{S}}-(A_{\text{NS},6\text{X}})(5.24/102.0 \text{ ppm})+I_{2\text{OH}}-(A_{\text{NS},6\text{S}})(5.01/104.8 \text{ ppm})+I_{2\text{OH}}-(A_{\text{NS}})(4.91/104.5 \text{ ppm})+G_{2\text{OH}}-(A_{\text{NS},3\text{S}})(4.61/103.8 \text{ ppm})+G_{2\text{OH}}-(A_{\text{NS}})(4.60/104.6 \text{ ppm})+G_{2\text{OH}}-(A_{\text{NAC}})(4.54/105.0 \text{ ppm})$ | $58 \pm 2$                |
| <u>Disaccharide</u>                                                        | <u>Calculation used</u>                                                                                                                                                                                                                                                                                                                                                   |                           |
| $A_{\text{NS},6\text{X}}-(\text{I}_{2\text{S}})+A_{\text{NAC}}-(\text{G})$ | $[A_{\text{NS},6\text{X}}-(\text{I}_{2\text{S}})+A_{\text{NAC}}-(\text{G})](5.39/99.4 \text{ ppm}) \div \text{A-Ring-}\text{C}_1$                                                                                                                                                                                                                                         |                           |
| $A_{\text{NS},6\text{X}}-(\text{I}_{2\text{OH}})$                          | $A_{\text{NS},6\text{X}}-(\text{I}_{2\text{OH}})(5.34/98.2 \text{ ppm}) \div \text{A-Ring-}\text{C}_1$                                                                                                                                                                                                                                                                    |                           |
| $A_{\text{NS},6\text{X}}-(\text{G})$                                       | $A_{\text{NS},6\text{X}}-(\text{G})(5.58/100.3 \text{ ppm}) \div \text{A-Ring-}\text{C}_1$                                                                                                                                                                                                                                                                                |                           |
| $A_{\text{NS},3\text{S},6\text{X}}-(\text{X})$                             | $A_{\text{NS},3\text{S},6\text{X}}(5.48/99.0 \text{ ppm}) \div \text{A-Ring-}\text{C}_1$                                                                                                                                                                                                                                                                                  |                           |
| $I_{2\text{S}}-(A_{\text{NS},6\text{S}})$                                  | $I_{2\text{S}}-(A_{\text{NS},6\text{X}})(5.24/102.0 \text{ ppm}) \div \text{U-Ring-}\text{C}_1$                                                                                                                                                                                                                                                                           |                           |
| $I_{2\text{OH}}-(A_{\text{NS},6\text{S}})$                                 | $I_{2\text{OH}}-(A_{\text{NS},6\text{S}})(5.01/104.8 \text{ ppm}) \div \text{U-Ring-}\text{C}_1$                                                                                                                                                                                                                                                                          |                           |
| $I_{2\text{OH}}-(A_{\text{NS},6\text{OH}})$                                | $I_{2\text{OH}}-(A_{\text{NS},6\text{OH}})(4.91/104.5 \text{ ppm}) \div \text{U-Ring-}\text{C}_1$                                                                                                                                                                                                                                                                         |                           |
| $G_{2\text{OH}}-(A_{\text{NS}})$                                           | $G_{2\text{OH}}-(A_{\text{NS}})(4.60/104.6 \text{ ppm}) \div \text{U-Ring-}\text{C}_1$                                                                                                                                                                                                                                                                                    |                           |
| $G_{2\text{OH}}-(A_{\text{NS},3\text{S}})$                                 | $G_{2\text{OH}}-(A_{\text{NS},3\text{S}})(4.61/103.9 \text{ ppm}) \div \text{U-Ring-}\text{C}_1$                                                                                                                                                                                                                                                                          |                           |
| $G_{2\text{OH}}-(A_{\text{NAC}})$                                          | $G_{2\text{OH}}-(A_{\text{NAC}})(4.52/105.3 \text{ ppm}) \div \text{U-Ring-}\text{C}_1$                                                                                                                                                                                                                                                                                   |                           |

**Supplemental Table 5:** Calculation of percent monosaccharide in tinzaparin from 2D  $^1\text{H}$ - $^{13}\text{C}$  HSQC NMR cross-peak integrated volumes. The chemical shift values in parentheses are the signals integrated. For illustrative purposes, the mean values obtained from the integration of the spectra from three lots of tinzaparin are shown.

| <u>Signals</u>                               | <u>Integrated Crosspeaks (<math>^1\text{H}/^{13}\text{C}</math> chemical shifts)</u>                                                                                                                                                                                                                                                                                                                                                                                                                                   | <u>Mean Volume (a.u.)</u> |
|----------------------------------------------|------------------------------------------------------------------------------------------------------------------------------------------------------------------------------------------------------------------------------------------------------------------------------------------------------------------------------------------------------------------------------------------------------------------------------------------------------------------------------------------------------------------------|---------------------------|
| A ring-C <sub>2</sub>                        | $A_{\text{NS},6\text{x}}(3.28/60.7 \text{ ppm}) + A_{\text{NS},3\text{S},6\text{x}}(3.45/59.5 \text{ ppm}) + A_{\text{NAc},6\text{x}}(3.93/56.6 \text{ ppm})$                                                                                                                                                                                                                                                                                                                                                          | $38 \pm 1$                |
| A ring-C <sub>6</sub>                        | $A_{\text{NS},6\text{S}}(4.26-4.38/69.1 \text{ ppm}) + A_{\text{NS}}(3.86/62.5 \text{ ppm})$                                                                                                                                                                                                                                                                                                                                                                                                                           | $59 \pm 2$                |
| A ring-C <sub>1</sub>                        | $A_{\text{NS}}-(\text{G})(5.58/100.4 \text{ ppm}) + A_{\text{NS},3\text{S},6\text{x}}(5.49/100.4 \text{ ppm}) + [A_{\text{NS},6\text{S}}-(\text{I}_{2\text{S}}) + A_{\text{NAc}}-(\text{G})](5.39/99.6 \text{ ppm}) + A_{\text{NS},6\text{x}}-(\text{I})(5.34/98.2 \text{ ppm}) + A_{\text{NS}}-\alpha\text{Red}(5.44/93.9 \text{ ppm}) + A_{\text{NAc}}-\alpha\text{Red}(5.20/93.5 \text{ ppm}) + A_{\text{NS}}-\beta\text{Red}(4.71/98.5 \text{ ppm})$                                                               | $55 \pm 2$                |
| Avg. A ring                                  | Average of C <sub>2</sub> , C <sub>6</sub> and C <sub>1</sub> Areas                                                                                                                                                                                                                                                                                                                                                                                                                                                    | $51 \pm 1$                |
| U/I/G-Ring Area-C <sub>1</sub>               | $\Delta U_{2\text{S}}(5.50/100.1 \text{ ppm}) + \text{I}_{2\text{S}}-(\text{A}_{\text{NS},6\text{x}})(5.23/102.0 \text{ ppm}) + \text{I}_{2\text{OH}}-(\text{A}_{\text{NS},6\text{S}})(5.02/104.8 \text{ ppm}) + \text{I}_{2\text{OH}}-(\text{A}_{\text{NS}})(4.95/104.6 \text{ ppm}) + \text{G}_{2\text{OH}}-(\text{A}_{\text{NS},3\text{S}})(4.62/103.9 \text{ ppm}) + \text{G}_{2\text{OH}}-(\text{A}_{\text{NS}})(4.60/104.7 \text{ ppm}) + \text{G}_{2\text{OH}}-(\text{A}_{\text{NAc}})(4.51/105.1 \text{ ppm})$ | $58 \pm 1$                |
| <u>% Monosacc.</u>                           | <u>Calculation Used</u>                                                                                                                                                                                                                                                                                                                                                                                                                                                                                                |                           |
| $A_{\text{NS},6\text{S}}-\text{C}_6$         | $A_{\text{NS},6\text{S}}(4.26-4.38/69.1 \text{ ppm}) \div \text{A ring}-\text{C}_6$                                                                                                                                                                                                                                                                                                                                                                                                                                    |                           |
| $A_{\text{NS},6\text{OH}}-\text{C}_6$        | $A_{\text{NS},6\text{OH}}(3.85/62.4 \text{ ppm}) \div \text{A ring}-\text{C}_6$                                                                                                                                                                                                                                                                                                                                                                                                                                        |                           |
| $A_{\text{NS},3\text{S}}-\text{C}_2$         | $A_{\text{NS},3\text{S},6\text{x}}(3.45/59.4 \text{ ppm}) \div \text{A ring}-\text{C}_2$                                                                                                                                                                                                                                                                                                                                                                                                                               |                           |
| $A_{\text{NAc}}-\text{C}_2$                  | $A_{\text{NAc}}(3.93/56.6 \text{ ppm}) \div \text{A ring}-\text{C}_2$                                                                                                                                                                                                                                                                                                                                                                                                                                                  |                           |
| $A_{\text{NS}}-\alpha\text{Red}-\text{C}_1$  | $A_{\text{NS}}-\alpha\text{Red}(5.44/93.9 \text{ ppm}) \div \text{A ring}-\text{C}_1$                                                                                                                                                                                                                                                                                                                                                                                                                                  |                           |
| $A_{\text{NAc}}-\alpha\text{Red}-\text{C}_1$ | $A_{\text{NAc}}-\alpha\text{Red}(5.20/93.5 \text{ ppm}) \div \text{A ring}-\text{C}_1$                                                                                                                                                                                                                                                                                                                                                                                                                                 |                           |
| $A_{\text{NS}}-\beta\text{Red}-\text{C}_1$   | $A_{\text{NS}}-\beta\text{Red}(4.71/98.5 \text{ ppm}) \div \text{A ring}-\text{C}_1$                                                                                                                                                                                                                                                                                                                                                                                                                                   |                           |
| $\text{I}_{2\text{S}}-\text{C}_1$            | $\text{I}_{2\text{S}}(5.23/102.0 \text{ ppm}) \div \text{U Ring C}_1$                                                                                                                                                                                                                                                                                                                                                                                                                                                  |                           |
| $\text{I}_{2\text{OH}}-\text{C}_1$           | $[\text{I}_{2\text{OH}}-(\text{A}_{\text{NS},6\text{S}})(5.02/104.8 \text{ ppm}) + \text{I}_{2\text{OH}}-(\text{A}_{\text{NS}})(4.95/104.6 \text{ ppm})]$                                                                                                                                                                                                                                                                                                                                                              |                           |
| $\text{G}_{2\text{OH}}-\text{C}_1$           | $\text{G}_{2\text{OH}}-(\text{A}_{\text{NS},3\text{S}})(4.62/103.9 \text{ ppm}) + \text{G}_{2\text{OH}}-(\text{A}_{\text{NS}})(4.60/104.7 \text{ ppm}) + \text{G}_{2\text{OH}}-(\text{A}_{\text{NAc}})(4.51/105.1 \text{ ppm})$                                                                                                                                                                                                                                                                                        |                           |
| $\Delta U_{2\text{S}}-\text{C}_1$            | $\Delta U_{2\text{S}} \text{ C}_1(5.50/100.1 \text{ ppm}) \div \text{U-Ring C}_1$                                                                                                                                                                                                                                                                                                                                                                                                                                      |                           |
| Linker-Xyl-C <sub>1</sub>                    | $\text{Xyl}(4.48/105.4 \text{ ppm}) \div \text{U-Ring C}_1$                                                                                                                                                                                                                                                                                                                                                                                                                                                            |                           |

**Supplemental Table 6:** Calculation of tinzaparin disaccharide composition based on 2D  $^1\text{H}$ - $^{13}\text{C}$  HSQC NMR  $\text{H}_1/\text{C}_1$  cross-peak integrated volumes. The chemical shift value shown in parentheses are the signals integrated to obtain volumes.

| <u>Signals</u>                                                             | <u>Integrated Crosspeaks (<math>^1\text{H}/^{13}\text{C}</math> chemical shifts)</u>                                                                                                                                                                                                                                                                                                                                                      | <u>Mean Volume (a.u.)</u> |
|----------------------------------------------------------------------------|-------------------------------------------------------------------------------------------------------------------------------------------------------------------------------------------------------------------------------------------------------------------------------------------------------------------------------------------------------------------------------------------------------------------------------------------|---------------------------|
| A-Ring- $\text{C}_1$<br>(n=3)                                              | $A_{\text{NS}}-(\text{G})(5.58/100.4 \text{ ppm})+A_{\text{NS},3\text{S},6\text{X}}(5.49/99.1 \text{ ppm})+[A_{\text{NS},6\text{S}}-(\text{I}_{2\text{S}})+A_{\text{NAC}}-(\text{G})](5.39/99.6 \text{ ppm})+A_{\text{NS},6\text{X}}-(\text{I})(5.34/98.2 \text{ ppm})+A_{\text{NS}}-\alpha\text{Red}(5.44/93.9 \text{ ppm})+A_{\text{NAC}}-\alpha\text{Red}(5.20/93.5 \text{ ppm})+A_{\text{NS}}-\beta\text{Red}(4.71/98.5 \text{ ppm})$ | $55 \pm 2$                |
| U/I/G-Ring- $\text{C}_1$<br>(n=3)                                          | $\Delta U_{2\text{S}}(5.50/100.1 \text{ ppm})+ I_{2\text{S}}-(A_{\text{NS},6\text{X}})(5.23/102.0 \text{ ppm})+I_{2\text{OH}}-(A_{\text{NS},6\text{S}})(5.02/104.8 \text{ ppm})+I_{2\text{OH}}-(A_{\text{NS}})(4.95/104.6 \text{ ppm})+G_{2\text{OH}}-(A_{\text{NS},3\text{S}})(4.62/103.9 \text{ ppm})+G_{2\text{OH}}-(A_{\text{NS}})(4.60/104.7 \text{ ppm})+G_{2\text{OH}}-(A_{\text{NAC}})(4.51/105.1 \text{ ppm})$                   | $58 \pm 1$                |
| <u>%Disaccharide</u>                                                       | <u>Calculation used</u>                                                                                                                                                                                                                                                                                                                                                                                                                   |                           |
| $A_{\text{NS},6\text{X}}-(\text{I}_{2\text{S}})+A_{\text{NAC}}-(\text{G})$ | $[A_{\text{NS},6\text{X}}-(\text{I}_{2\text{S}})+A_{\text{NAC}}-(\text{G})](5.39/99.6 \text{ ppm})\div\text{A-Ring-}\text{C}_1$                                                                                                                                                                                                                                                                                                           |                           |
| $A_{\text{NS},6\text{X}}-(\text{I}_{2\text{OH}})$                          | $A_{\text{NS},6\text{X}}-(\text{I}_{2\text{OH}})(5.34/98.2 \text{ ppm})\div\text{A-Ring-}\text{C}_1$                                                                                                                                                                                                                                                                                                                                      |                           |
| $A_{\text{NS},6\text{X}}-(\text{G})$                                       | $A_{\text{NS},6\text{X}}-(\text{G})(5.58/100.4 \text{ ppm})\div\text{A-Ring-}\text{C}_1$                                                                                                                                                                                                                                                                                                                                                  |                           |
| $A_{\text{NS},3\text{S},6\text{X}}-(\text{X})$                             | $A_{\text{NS},3\text{S},6\text{X}}(5.49/99.1 \text{ ppm})\div\text{A-Ring-}\text{C}_1$                                                                                                                                                                                                                                                                                                                                                    |                           |
| $I_{2\text{S}}-(A_{\text{NS},6\text{S}})$                                  | $I_{2\text{S}}-(A_{\text{NS},6\text{X}})(5.23/102.0 \text{ ppm})\div\text{U-Ring-}\text{C}_1$                                                                                                                                                                                                                                                                                                                                             |                           |
| $I_{2\text{OH}}-(A_{\text{NS},6\text{S}})$                                 | $I_{2\text{OH}}-(A_{\text{NS},6\text{S}})(5.02/104.8 \text{ ppm})\div\text{U-Ring-}\text{C}_1$                                                                                                                                                                                                                                                                                                                                            |                           |
| $I_{2\text{OH}}-(A_{\text{NS},6\text{OH}})$                                | $I_{2\text{OH}}-(A_{\text{NS},6\text{OH}})(4.95/104.6 \text{ ppm})\div\text{U-Ring-}\text{C}_1$                                                                                                                                                                                                                                                                                                                                           |                           |
| $G_{2\text{OH}}-(A_{\text{NS}})$                                           | $G_{2\text{OH}}-(A_{\text{NS}})(4.60/104.7 \text{ ppm})\div\text{U-Ring-}\text{C}_1$                                                                                                                                                                                                                                                                                                                                                      |                           |
| $G_{2\text{OH}}-(A_{\text{NS},3\text{S}})$                                 | $G_{2\text{OH}}-(A_{\text{NS},3\text{S}})(4.62/103.9 \text{ ppm})\div\text{U-Ring-}\text{C}_1$                                                                                                                                                                                                                                                                                                                                            |                           |
| $G_{2\text{OH}}-(A_{\text{NAC}})$                                          | $G_{2\text{OH}}-(A_{\text{NAC}})(4.51/105.1 \text{ ppm})\div\text{U-Ring-}\text{C}_1$                                                                                                                                                                                                                                                                                                                                                     |                           |
| $\Delta U_{2\text{S}}-(\text{A})$                                          | $\Delta U_{2\text{S}}(5.50/100.1 \text{ ppm})\div\text{U-Ring-}\text{C}_1$                                                                                                                                                                                                                                                                                                                                                                |                           |

**Supplemental Table 7:** Calculation of percent monosaccharide composition of enoxaparin from 2D  $^1\text{H}$ - $^{13}\text{C}$  HSQC NMR cross peak integrated volumes. The chemical shift values in parentheses are the signals integrated. For illustrative purposes, the mean values obtained from the integration of the spectra from four lots of enoxaparin are shown.

| <b>Signals</b>                               | <b>Integrated Crosspeaks (<math>^1\text{H}/^{13}\text{C}</math> chemical shifts)</b>                                                                                                                                                                                                                                                                                                                                                                                                                                                                                                                                                                                                                                     | <b>Mean</b> |
|----------------------------------------------|--------------------------------------------------------------------------------------------------------------------------------------------------------------------------------------------------------------------------------------------------------------------------------------------------------------------------------------------------------------------------------------------------------------------------------------------------------------------------------------------------------------------------------------------------------------------------------------------------------------------------------------------------------------------------------------------------------------------------|-------------|
| A ring-C <sub>2</sub>                        | $A_{\text{NS},6\text{x}}(3.28/60.7 \text{ ppm}) + A_{\text{NS},3\text{S},6\text{x}}(3.46/59.4 \text{ ppm}) + A_{\text{NAc},6\text{x}}(3.92/56.5 \text{ ppm}) + 1,6\text{-an.A}(3.21/58.3 \text{ ppm}) + 1,6\text{-an.M}(3.46/55.0 \text{ ppm}) + M_{\text{NS}}\text{-}\alpha\text{Red}(3.61/60.2 \text{ ppm}) + \text{Epo-I}(3.73/54.2 \text{ ppm})$                                                                                                                                                                                                                                                                                                                                                                     | $40 \pm 3$  |
| A ring-C <sub>6</sub>                        | $A_{\text{NS},6\text{S}}(4.28\text{-}4.38/69.1 \text{ ppm}) + A_{\text{NS}}(3.85/62.5 \text{ ppm}) + 1,6\text{-an.A}(3.78/67.4 \text{ ppm}) + 1,6\text{-an.M}(3.80/68.0 \text{ ppm})$                                                                                                                                                                                                                                                                                                                                                                                                                                                                                                                                    | $57 \pm 5$  |
| A ring-C <sub>1</sub>                        | $A_{\text{NS}}\text{-(G)}(5.56/100.4 \text{ ppm}) + A_{\text{NS},3\text{S},6\text{x}}(5.48/99.0 \text{ ppm}) + [A_{\text{NS},6\text{S}}\text{-(I}_2\text{S)} + A_{\text{NAc}}\text{-(G)}](5.37/99.6 \text{ ppm}) + A_{\text{NS},6\text{x}}\text{-(I)}(5.34/98.2 \text{ ppm}) + 1,6\text{-an.A}(5.61/104.1 \text{ ppm}) + 1,6\text{-an.M}(5.56/103.7 \text{ ppm}) + M_{\text{NS}}\text{-}\alpha\text{Red}(5.39/95.6 \text{ ppm}) + A_{\text{NS}}\text{-}\alpha\text{Red}(5.44/93.9 \text{ ppm}) + A_{\text{NAc}}\text{-}\alpha\text{Red}(5.20/93.4 \text{ ppm}) + A_{\text{NS}}\text{-}\beta\text{Red}(4.71/98.5 \text{ ppm})$                                                                                            | $59 \pm 5$  |
| Avg. A ring                                  | Average of C <sub>2</sub> , C <sub>6</sub> and C <sub>1</sub> Areas                                                                                                                                                                                                                                                                                                                                                                                                                                                                                                                                                                                                                                                      | $52 \pm 4$  |
| U/I/G-ring Area-C <sub>1</sub>               | $\Delta U_{2\text{S}}(5.50/100.1 \text{ ppm}) + \Delta U_{2\text{OH}}(5.16/103.7 \text{ ppm}) + I_{2\text{S}}\text{-(A}_{\text{NS},6\text{x}})(5.22/102.0 \text{ ppm}) + I_{2\text{OH}}\text{-(A}_{\text{NS},6\text{S}})(5.00/104.8 \text{ ppm}) + I_{2\text{OH}}\text{-(A}_{\text{NS}})(4.94/104.5 \text{ ppm}) + G_{2\text{S}}\text{-(A}_{\text{NS}})(4.73/102.9 \text{ ppm}) + G_{2\text{OH}}\text{-(A}_{\text{NS},3\text{S}})(4.61/103.8 \text{ ppm}) + G_{2\text{OH}}\text{-(A}_{\text{NS}})(4.60/104.6 \text{ ppm}) + G_{2\text{OH}}\text{-(A}_{\text{NAc}})(4.51/105.0 \text{ ppm}) + I_{2\text{S}}\text{-}\beta\text{Red}(4.99/94.6 \text{ ppm}) + I_{2\text{S}}\text{-}\alpha\text{Red}(5.42/95.4 \text{ ppm})$ | $61 \pm 5$  |
| <b>% Monosac.</b>                            | <b>Calculation Used</b>                                                                                                                                                                                                                                                                                                                                                                                                                                                                                                                                                                                                                                                                                                  |             |
| $A_{\text{NS},6\text{S}}\text{-C}_6$         | $A_{\text{NS},6\text{S}}(4.28\text{-}4.38/69.1 \text{ ppm}) \div \text{A ring-C}_6$                                                                                                                                                                                                                                                                                                                                                                                                                                                                                                                                                                                                                                      |             |
| $A_{\text{NS},6\text{OH}}\text{-C}_6$        | $A_{\text{NS},6\text{OH}}(3.85/62.4 \text{ ppm}) \div \text{A ring-C}_6$                                                                                                                                                                                                                                                                                                                                                                                                                                                                                                                                                                                                                                                 |             |
| $A_{\text{NS},3\text{S}}\text{-C}_2$         | $A_{\text{NS},3\text{S},6\text{x}}(3.46/59.4 \text{ ppm}) \div \text{A ring-C}_2$                                                                                                                                                                                                                                                                                                                                                                                                                                                                                                                                                                                                                                        |             |
| $A_{\text{NAc}}\text{-C}_2$                  | $A_{\text{NAc},6\text{x}}(3.92/56.5 \text{ ppm}) \div \text{A ring-C}_2$                                                                                                                                                                                                                                                                                                                                                                                                                                                                                                                                                                                                                                                 |             |
| $A_{\text{NS}}\text{-}\alpha\text{Red-C}_1$  | $A_{\text{NS}}\text{-}\alpha\text{Red}(5.44/93.9 \text{ ppm}) \div \text{A ring-C}_1$                                                                                                                                                                                                                                                                                                                                                                                                                                                                                                                                                                                                                                    |             |
| $A_{\text{NAc}}\text{-}\alpha\text{Red-C}_1$ | $A_{\text{NAc}}\text{-}\alpha\text{Red}(5.20/93.4 \text{ ppm}) \div \text{A ring-C}_1$                                                                                                                                                                                                                                                                                                                                                                                                                                                                                                                                                                                                                                   |             |
| $A_{\text{NS}}\text{-}\beta\text{Red-C}_1$   | $A_{\text{NS}}\text{-}\beta\text{Red}(4.71/98.5 \text{ ppm}) \div \text{A ring-C}_1$                                                                                                                                                                                                                                                                                                                                                                                                                                                                                                                                                                                                                                     |             |
| $M_{\text{NS}}\text{-}\alpha\text{Red-C}_1$  | $M_{\text{NS}}\text{-}\alpha\text{Red}(5.39/95.6 \text{ ppm}) \div \text{A ring-C}_1$                                                                                                                                                                                                                                                                                                                                                                                                                                                                                                                                                                                                                                    |             |
| 1,6-an.A-C <sub>1</sub>                      | $1,6\text{-an.A}(5.61/104.1 \text{ ppm}) \div \text{A ring-C}_1$                                                                                                                                                                                                                                                                                                                                                                                                                                                                                                                                                                                                                                                         |             |
| 1,6-an.M-C <sub>1</sub>                      | $1,6\text{-an.M}(5.56/103.7 \text{ ppm}) \div \text{A ring-C}_1$                                                                                                                                                                                                                                                                                                                                                                                                                                                                                                                                                                                                                                                         |             |
| $I_{2\text{S}}\text{-C}_1$                   | $I_{2\text{S}}(5.22/102.0 \text{ ppm}) \div \text{U Ring C}_1$                                                                                                                                                                                                                                                                                                                                                                                                                                                                                                                                                                                                                                                           |             |
| $I_{2\text{OH}}\text{-C}_1$                  | $[I_{2\text{OH}}\text{-(A}_{\text{NS},6\text{S}})(5.00/104.8 \text{ ppm}) + I_{2\text{OH}}\text{-(A}_{\text{NS}})(4.94/104.5 \text{ ppm})] \div \text{U-Ring C}_1$                                                                                                                                                                                                                                                                                                                                                                                                                                                                                                                                                       |             |
| $G_{2\text{S}}\text{-C}_1$                   | $G_{2\text{S}}\text{-(A}_{\text{NS}})(4.73/102.9 \text{ ppm}) \div \text{U-Ring C}_1$                                                                                                                                                                                                                                                                                                                                                                                                                                                                                                                                                                                                                                    |             |
| $G_{2\text{OH}}\text{-C}_1$                  | $G_{2\text{OH}}\text{-(A}_{\text{NS},3\text{S}})(4.61/103.8 \text{ ppm}) + G_{2\text{OH}}\text{-(A}_{\text{NS}})(4.60/104.6 \text{ ppm}) + G_{2\text{OH}}\text{-(A}_{\text{NAc}})(4.51/105.0 \text{ ppm}) \div \text{U-Ring C}_1$                                                                                                                                                                                                                                                                                                                                                                                                                                                                                        |             |
| $\Delta U_{2\text{S}}\text{-C}_1$            | $\Delta U_{2\text{S}} \text{ C}_1(5.50/100.1 \text{ ppm}) \div \text{U-Ring C}_1$                                                                                                                                                                                                                                                                                                                                                                                                                                                                                                                                                                                                                                        |             |
| $\Delta U_{2\text{OH}}\text{-C}_1$           | $\Delta U_{2\text{OH}}(5.16/103.7 \text{ ppm}) \div \text{U-Ring C}_1$                                                                                                                                                                                                                                                                                                                                                                                                                                                                                                                                                                                                                                                   |             |
| $I_{2\text{S}}\text{-}\beta\text{Red-C}_1$   | $I_{2\text{S}}\text{-}\beta\text{Red}(4.99/94.6 \text{ ppm}) \div \text{U-Ring C}_1$                                                                                                                                                                                                                                                                                                                                                                                                                                                                                                                                                                                                                                     |             |
| $I_{2\text{S}}\text{-}\alpha\text{Red-C}_1$  | $I_{2\text{S}}\text{-}\alpha\text{Red}(5.42/95.4 \text{ ppm}) \div \text{U-Ring C}_1$                                                                                                                                                                                                                                                                                                                                                                                                                                                                                                                                                                                                                                    |             |
| Epo-I-C <sub>2</sub>                         | $\text{Epo-I}(3.73/54.2 \text{ ppm}) \div \text{A ring-C}_2$                                                                                                                                                                                                                                                                                                                                                                                                                                                                                                                                                                                                                                                             |             |
| GalA-C <sub>5</sub>                          | $\text{GalA}(4.66/74.4 \text{ ppm}) \div \text{Avg. A-ring}$                                                                                                                                                                                                                                                                                                                                                                                                                                                                                                                                                                                                                                                             |             |
| Linker-Xyl-C <sub>1</sub>                    | $\text{Xyl}(4.44/105.6 \text{ ppm}) \div \text{U-Ring C}_1$                                                                                                                                                                                                                                                                                                                                                                                                                                                                                                                                                                                                                                                              |             |

**Supplemental Table 8:** Calculation of enoxaparin percent disaccharide composition in the USP enoxaparin standard based on 2D  $^1\text{H}$ - $^{13}\text{C}$  HSQC NMR  $\text{H}_1/\text{C}_1$  cross-peak integrated volumes. The chemical shift value shown in parentheses are the signals integrated to obtain volumes.

| <b>Signals</b>                                                             | <b>Integrated Crosspeaks (<math>^1\text{H}/^{13}\text{C}</math> chemical shifts)</b>                                                                                                                                                                                                                                                                                                                                                                                                                                                                                                                                                                                                                                                                                                                                              | <b>Int. Area</b> |
|----------------------------------------------------------------------------|-----------------------------------------------------------------------------------------------------------------------------------------------------------------------------------------------------------------------------------------------------------------------------------------------------------------------------------------------------------------------------------------------------------------------------------------------------------------------------------------------------------------------------------------------------------------------------------------------------------------------------------------------------------------------------------------------------------------------------------------------------------------------------------------------------------------------------------|------------------|
| A-Ring- $\text{C}_1$<br>(n=4)                                              | $A_{\text{NS}}-(\text{G})(5.56/100.4 \text{ ppm})+A_{\text{NS},3\text{S},6\text{X}}(5.48/99.0 \text{ ppm})+[A_{\text{NS},6\text{S}}-(\text{I}_{2\text{S}})+A_{\text{NAC}}-(\text{G})](5.37/99.6 \text{ ppm})+A_{\text{NS},6\text{X}}-(\text{I})(5.34/98.2 \text{ ppm})+1,6\text{-an.A}(5.61/104.1 \text{ ppm})+1,6\text{-an.M}(5.56/103.7 \text{ ppm})+M_{\text{NS}}-\alpha\text{Red}(5.39/95.6 \text{ ppm})+A_{\text{NS}}-\alpha\text{Red}(5.44/93.9 \text{ ppm})+A_{\text{NAC}}-\alpha\text{Red}(5.20/93.4 \text{ ppm})+A_{\text{NS}}-\beta\text{Red}(4.71/98.5 \text{ ppm})$                                                                                                                                                                                                                                                   | $59 \pm 5$       |
| U/I/G-Ring- $\text{C}_1$<br>(n=4)                                          | $\Delta\text{U}_{2\text{S}}(5.50/100.1 \text{ ppm})+\Delta\text{U}_{2\text{OH}}(5.16/103.7 \text{ ppm})+\text{I}_{2\text{S}}-(A_{\text{NS},6\text{X}})(5.22/102.0 \text{ ppm})+\text{I}_{2\text{OH}}-(A_{\text{NS},6\text{S}})(5.00/104.8 \text{ ppm})+\text{I}_{2\text{OH}}-(A_{\text{NS}})(4.94/104.5 \text{ ppm})+\text{G}_{2\text{S}}-(A_{\text{NS}})(4.73/102.9 \text{ ppm})+\text{G}_{2\text{OH}}-(A_{\text{NS},3\text{S}})(4.61/103.8 \text{ ppm})+\text{G}_{2\text{OH}}-(A_{\text{NS}})(4.60/104.6 \text{ ppm})+\text{G}_{2\text{OH}}-(A_{\text{NAC}})(4.51/105.0 \text{ ppm})+\text{I}_{2\text{S}}-\beta\text{Red}(4.99/94.6 \text{ ppm})+\text{I}_{2\text{S}}-\alpha\text{Red}(5.42/95.4 \text{ ppm})_{2\text{S}}-\beta\text{Red}(4.59/104.7 \text{ ppm})+\text{I}_{2\text{S}}-\alpha\text{Red}(5.42/95.4 \text{ ppm})$ | $61 \pm 5$       |
| <b>%Disaccharide</b>                                                       | <b>Calculation used</b>                                                                                                                                                                                                                                                                                                                                                                                                                                                                                                                                                                                                                                                                                                                                                                                                           |                  |
| $A_{\text{NS},6\text{X}}-(\text{I}_{2\text{S}})+A_{\text{NAC}}-(\text{G})$ | $[A_{\text{NS},6\text{X}}-(\text{I}_{2\text{S}})+A_{\text{NAC}}-(\text{G})](5.37/99.6 \text{ ppm}) \div \text{A-Ring-}\text{C}_1$                                                                                                                                                                                                                                                                                                                                                                                                                                                                                                                                                                                                                                                                                                 |                  |
| $A_{\text{NS},6\text{X}}-(\text{I}_{2\text{OH}})$                          | $A_{\text{NS},6\text{X}}-(\text{I}_{2\text{OH}})(5.34/98.2 \text{ ppm}) \div \text{A-Ring-}\text{C}_1$                                                                                                                                                                                                                                                                                                                                                                                                                                                                                                                                                                                                                                                                                                                            |                  |
| $A_{\text{NS},6\text{X}}-(\text{G})$                                       | $A_{\text{NS},6\text{X}}-(\text{G})(5.56/100.4 \text{ ppm}) \div \text{A-Ring-}\text{C}_1$                                                                                                                                                                                                                                                                                                                                                                                                                                                                                                                                                                                                                                                                                                                                        |                  |
| $A_{\text{NS},3\text{S},6\text{X}}-(\text{X})$                             | $A_{\text{NS},3\text{S},6\text{X}}(5.48/99.0 \text{ ppm}) \div \text{A-Ring-}\text{C}_1$                                                                                                                                                                                                                                                                                                                                                                                                                                                                                                                                                                                                                                                                                                                                          |                  |
| $\text{I}_{2\text{S}}-(A_{\text{NS},6\text{S}})$                           | $\text{I}_{2\text{S}}-(A_{\text{NS},6\text{X}})(5.22/102.0 \text{ ppm}) \div \text{U-Ring-}\text{C}_1$                                                                                                                                                                                                                                                                                                                                                                                                                                                                                                                                                                                                                                                                                                                            |                  |
| $\text{I}_{2\text{OH}}-(A_{\text{NS},6\text{S}})$                          | $\text{I}_{2\text{OH}}-(A_{\text{NS},6\text{S}})(5.00/104.8 \text{ ppm}) \div \text{U-Ring-}\text{C}_1$                                                                                                                                                                                                                                                                                                                                                                                                                                                                                                                                                                                                                                                                                                                           |                  |
| $\text{I}_{2\text{OH}}-(A_{\text{NS},6\text{OH}})$                         | $\text{I}_{2\text{OH}}-(A_{\text{NS},6\text{OH}})(4.94/104.5 \text{ ppm}) \div \text{U-Ring-}\text{C}_1$                                                                                                                                                                                                                                                                                                                                                                                                                                                                                                                                                                                                                                                                                                                          |                  |
| $\text{G}_{2\text{S}}-(A_{\text{NS}})$                                     | $\text{G}_{2\text{S}}-(A_{\text{NS}})(4.73/102.9 \text{ ppm}) \div \text{U-Ring-}\text{C}_1$                                                                                                                                                                                                                                                                                                                                                                                                                                                                                                                                                                                                                                                                                                                                      |                  |
| $\text{G}_{2\text{OH}}-(A_{\text{NS}})$                                    | $\text{G}_{2\text{OH}}-(A_{\text{NS}})(4.60/104.6 \text{ ppm}) \div \text{U-Ring-}\text{C}_1$                                                                                                                                                                                                                                                                                                                                                                                                                                                                                                                                                                                                                                                                                                                                     |                  |
| $\text{G}_{2\text{OH}}-(A_{\text{NS},3\text{S}})$                          | $\text{G}_{2\text{OH}}-(A_{\text{NS},3\text{S}})(4.61/103.8 \text{ ppm}) \div \text{U-Ring-}\text{C}_1$                                                                                                                                                                                                                                                                                                                                                                                                                                                                                                                                                                                                                                                                                                                           |                  |
| $\Delta\text{U}_{2\text{S}}-(\text{A})$                                    | $\Delta\text{U}_{2\text{S}}(5.50/100.1 \text{ ppm}) \div \text{U-Ring-}\text{C}_1$                                                                                                                                                                                                                                                                                                                                                                                                                                                                                                                                                                                                                                                                                                                                                |                  |
| $\Delta\text{U}_{2\text{OH}}-(\text{A})$                                   | $\Delta\text{U}_{2\text{OH}}(5.16/103.7 \text{ ppm}) \div \text{U-Ring-}\text{C}_1$                                                                                                                                                                                                                                                                                                                                                                                                                                                                                                                                                                                                                                                                                                                                               |                  |

**Supplemental Table 9:** Comparison of integrated 2D-HSQC volumes acquired with different parameters on the same sample. The values are the integrated volume of each signal divided by the comparison spectrum. In the case of the signal to noise comparison all volumes were normalized to the volume obtained with the 2.7 h experiment. For the relaxation delay comparison all values were divided by the values obtained in the 10.9 h experiment.

| Signal Integrated<br>Parameter Altered→<br>Experiment Time Ratio→ | Signal-to-Noise Comparison             |                       |                      |                     |
|-------------------------------------------------------------------|----------------------------------------|-----------------------|----------------------|---------------------|
|                                                                   | Relaxation Delay<br>Comparison (nt=32) |                       |                      |                     |
|                                                                   | d1=12.6/1.5<br>68.3/10.9 h             | nt=32/8<br>10.9/2.7 h | nt=16/8<br>5.4/2.7 h | nt=8/8<br>2.7/2.7 h |
| <b>A<sub>NAc,6x</sub>-C2</b>                                      | 1.32                                   | 4.41                  | 2.13                 | 1.00                |
| <b>A<sub>NS,3S,6x</sub>-C2</b>                                    | 1.57                                   | 3.90                  | 1.79                 | 1.00                |
| <b>A<sub>NS,6x</sub>-C2</b>                                       | 1.30                                   | 3.79                  | 1.97                 | 1.00                |
| <b>A<sub>NS,6OH</sub>-C6</b>                                      | 1.13                                   | 3.74                  | 1.93                 | 1.00                |
| <b>A<sub>NS,6S</sub>-C6</b>                                       | 1.50                                   | 3.95                  | 2.04                 | 1.00                |
| <b>A<sub>NS-αRed</sub>-C1</b>                                     | 1.55                                   | 4.70                  | 1.90                 | 1.00                |
| <b>A<sub>NS,6x</sub>-I<sub>2OH</sub>-C1</b>                       | 1.56                                   | 4.14                  | 2.02                 | 1.00                |
| <b>A<sub>NS,6S</sub>-I<sub>2S</sub>+A<sub>NAc</sub>-G-C1</b>      | 1.62                                   | 3.92                  | 2.03                 | 1.00                |
| <b>A<sub>NS</sub>-G-C1</b>                                        | 1.38                                   | 4.70                  | 2.27                 | 1.00                |
| <b>A<sub>NS,3S,6S</sub>-C1</b>                                    | 1.49                                   | 4.13                  | 2.01                 | 1.00                |
| <b>I<sub>2S</sub>-A<sub>NS,6x</sub>-C1</b>                        | 1.36                                   | 3.98                  | 2.04                 | 1.00                |
| <b>I<sub>2OH</sub>-A<sub>NS,6S</sub>-C1</b>                       | 1.36                                   | 3.62                  | 1.88                 | 1.00                |
| <b>I<sub>2OH</sub>-A<sub>NS</sub>-C1</b>                          | 1.56                                   | 3.28                  | 1.74                 | 1.00                |
| <b>G<sub>2OH</sub>-A<sub>NS,3S,6S</sub>-C1</b>                    | 1.53                                   | 3.67                  | 1.93                 | 1.00                |
| <b>G<sub>2OH</sub>-A<sub>NAc</sub>-C1</b>                         | 1.55                                   | 4.29                  | 2.17                 | 1.00                |
| <b>G<sub>2OH</sub>-A<sub>NS</sub>-C1</b>                          | 1.53                                   | 3.88                  | 2.01                 | 1.00                |
| <b>A<sub>NAc</sub>-Methyl</b>                                     | 1.64                                   | 3.59                  | 1.75                 | 1.00                |
| <b>Xyl-Linker-C1</b>                                              | 1.71                                   | 3.61                  | 1.88                 | 1.00                |
| Mean (n=18)                                                       | 1.48                                   | 3.96                  | 1.97                 |                     |
| Standard Deviation                                                | 0.14                                   | 0.38                  | 0.14                 |                     |
| %RSD                                                              | 9.7%                                   | 9.7%                  | 7.1%                 |                     |
